# Supplementary material for: ZMIZ1 enhances ERα-dependent expression of E2F2 in breast cancer
Source: PubMed Central journal article supplement (PMC11103680; doi:10.1530/jme-23-0133), 2024-04-25
Supplement: supplementary_table_1.pdf [file supplementary_table_1.pdf]

**Table S1** – Summarised qPLEX-RIME results for differentially bound proteins detected with an adjusted p-value > 0.05. Full data is available in the R-package linked from the main text.

|    | Accession | Protein Symbol | Fold Change | P-value | Adjusted P-Value |
|----|-----------|----------------|-------------|---------|------------------|
| 1  | Q9C091    | GREB1L         | -1.53       | 3.1E-09 | 5.2E-06          |
| 2  | Q15532    | SS18           | 1.68        | 2.6E-08 | 2.1E-05          |
| 3  | Q8TAQ2    | SMARCC2        | 1.86        | 5.4E-08 | 2.3E-05          |
| 4  | Q9Y2G9    | SBNO2          | 1.81        | 5.7E-08 | 2.3E-05          |
| 5  | P55317    | FOXA1          | 1.58        | 8.4E-08 | 2.5E-05          |
| 6  | P11474    | ESRRA          | 1.45        | 1.5E-07 | 2.5E-05          |
| 7  | P63279    | UBE2I          | 1.48        | 1.6E-07 | 2.5E-05          |
| 8  | Q9Y4B4    | RAD54L2        | 2.21        | 1.7E-07 | 2.5E-05          |
| 9  | Q13451    | FKBP5          | -2.23       | 1.7E-07 | 2.5E-05          |
| 10 | Q9Y6Q9    | NCOA3          | 1.98        | 1.7E-07 | 2.5E-05          |
| 11 | Q09472    | EP300          | 2.06        | 1.9E-07 | 2.5E-05          |
| 12 | O75925    | PIAS1          | 1.38        | 1.9E-07 | 2.5E-05          |
| 13 | Q15596    | NCOA2          | 1.68        | 2.1E-07 | 2.5E-05          |
| 14 | P40424    | PBX1           | 1.56        | 2.1E-07 | 2.5E-05          |
| 15 | O43474    | KLF4           | 1.43        | 2.3E-07 | 2.5E-05          |
| 16 | O75177    | SS18L1         | 1.39        | 2.4E-07 | 2.5E-05          |
| 17 | O43791    | SPOP           | 1.7         | 2.9E-07 | 2.8E-05          |
| 18 | Q86Z02    | HIPK1          | 1.58        | 3.1E-07 | 2.8E-05          |
| 19 | P51532    | SMARCA4        | 1.22        | 3.6E-07 | 3.1E-05          |
| 20 | P28702    | RXRB           | 1.64        | 4.1E-07 | 3.3E-05          |
| 21 | Q13485    | SMAD4          | 2.35        | 4.3E-07 | 3.3E-05          |
| 22 | O95365    | ZBTB7A         | 1.13        | 4.5E-07 | 3.3E-05          |
| 23 | O14686    | KMT2D          | 1.25        | 4.8E-07 | 3.4E-05          |
| 24 | Q92793    | CREBBP         | 2.09        | 5E-07   | 3.4E-05          |
| 25 | O14497    | ARID1A         | 1.26        | 5.1E-07 | 3.4E-05          |
| 26 | Q9Y2X0    | MED16          | 1.32        | 5.7E-07 | 3.6E-05          |
| 27 | P61956    | SUMO2          | 1.99        | 5.9E-07 | 3.6E-05          |
| 28 | Q8TE85    | GRHL3          | 1.46        | 6.4E-07 | 3.8E-05          |
| 29 | P07900    | HSP90AA1       | -1.78       | 6.9E-07 | 3.9E-05          |
| 30 | Q13887    | KLF5           | 2.18        | 7.3E-07 | 4E-05            |
| 31 | Q86U70    | LDB1           | 1.14        | 9E-07   | 4.7E-05          |
| 32 | P48552    | NRIP1          | 2.1         | 9.1E-07 | 4.7E-05          |
| 33 | Q6IQ16    | SPOPL          | 1.61        | 9.8E-07 | 4.8E-05          |
| 34 | O15164    | TRIM24         | 2.03        | 1E-06   | 4.8E-05          |
| 35 | P31689    | DNAJA1         | -1          | 1E-06   | 4.8E-05          |
| 36 | P10276    | RARA           | 2.04        | 1.1E-06 | 4.9E-05          |
| 37 | P08238    | HSP90AB1       | -1.51       | 1.2E-06 | 5.1E-05          |
| 38 | Q15788    | NCOA1          | 1.54        | 1.2E-06 | 5.3E-05          |
| 39 | Q6EEV6    | SUMO4          | 1.92        | 1.3E-06 | 5.4E-05          |

|    |        |          |       |         |         |
|----|--------|----------|-------|---------|---------|
| 40 | Q9BRQ0 | PYGO2    | 1.34  | 1.3E-06 | 5.4E-05 |
| 41 | P55854 | SUMO3    | 2.06  | 1.3E-06 | 5.4E-05 |
| 42 | Q9Y6X2 | PIAS3    | 1.52  | 1.6E-06 | 6.4E-05 |
| 43 | Q6ZW49 | PAXIP1   | 1.06  | 1.9E-06 | 7.2E-05 |
| 44 | O00712 | NFIB     | 1.2   | 1.9E-06 | 7.2E-05 |
| 45 | Q8NEZ4 | KMT2C    | 0.94  | 2.2E-06 | 7.9E-05 |
| 46 | P31276 | HOXC13   | 1.47  | 2.2E-06 | 8E-05   |
| 47 | Q92754 | TFAP2C   | 1.72  | 2.3E-06 | 8E-05   |
| 48 | Q5JPI3 | C3orf38  | 1     | 2.3E-06 | 8E-05   |
| 49 | Q96G25 | MED8     | 1.15  | 2.4E-06 | 8.1E-05 |
| 50 | Q6ISB3 | GRHL2    | 1.17  | 2.7E-06 | 8.8E-05 |
| 51 | Q01196 | RUNX1    | 1.1   | 2.7E-06 | 8.8E-05 |
| 52 | Q92925 | SMARCD2  | 0.97  | 3.2E-06 | 1E-04   |
| 53 | O75448 | MED24    | 1.3   | 3.3E-06 | 1E-04   |
| 54 | Q9UPN9 | TRIM33   | 1.82  | 4E-06   | 0.00012 |
| 55 | O15550 | KDM6A    | 1.52  | 4.3E-06 | 0.00013 |
| 56 | P19793 | RXRA     | 1.69  | 4.4E-06 | 0.00013 |
| 57 | P46937 | YAP1     | 1.19  | 5E-06   | 0.00015 |
| 58 | Q9NWF9 | RNF216   | 1.31  | 5.9E-06 | 0.00017 |
| 59 | Q02790 | FKBP4    | -1.65 | 6.1E-06 | 0.00017 |
| 60 | Q4ZG55 | GREB1    | -1.75 | 7.2E-06 | 2E-04   |
| 61 | O75081 | CBFA2T3  | 1.16  | 9.5E-06 | 0.00026 |
| 62 | O60479 | DLX3     | 1.95  | 1.2E-05 | 0.00031 |
| 63 | P84022 | SMAD3    | 1.06  | 1.3E-05 | 0.00034 |
| 64 | P40763 | STAT3    | 0.8   | 1.6E-05 | 4E-04   |
| 65 | Q9UKL0 | RCOR1    | 1.05  | 1.6E-05 | 4E-04   |
| 66 | Q969G3 | SMARCE1  | 0.86  | 1.7E-05 | 0.00043 |
| 67 | Q9UBL3 | ASH2L    | 1.29  | 1.8E-05 | 0.00045 |
| 68 | P10588 | NR2F6    | 1.2   | 2.1E-05 | 5E-04   |
| 69 | Q9UER7 | DAXX     | 1.33  | 2.3E-05 | 0.00056 |
| 70 | Q86UU0 | BCL9L    | 1.11  | 2.5E-05 | 0.00059 |
| 71 | Q13950 | RUNX2    | 1.21  | 2.9E-05 | 0.00066 |
| 72 | Q5TC79 | ZBTB37   | 1.2   | 3.3E-05 | 0.00075 |
| 73 | O60884 | DNAJA2   | -1.03 | 3.8E-05 | 0.00086 |
| 74 | Q9NZI5 | GRHL1    | 0.99  | 3.9E-05 | 0.00086 |
| 75 | P17275 | JUNB     | 1.07  | 4.3E-05 | 0.00095 |
| 76 | Q7Z5J4 | RAI1     | 0.95  | 4.4E-05 | 0.00095 |
| 77 | Q9UIU6 | SIX4     | 1.25  | 5.3E-05 | 0.0011  |
| 78 | Q6ZRI6 | C15orf39 | 1.04  | 5.3E-05 | 0.0011  |
| 79 | Q92785 | DPF2     | 1.19  | 5.4E-05 | 0.0011  |
| 80 | P23771 | GATA3    | 1.17  | 5.5E-05 | 0.0011  |
| 81 | P24468 | NR2F2    | 1.04  | 6.6E-05 | 0.0013  |
| 82 | Q9ULJ6 | ZMIZ1    | 1.27  | 7.1E-05 | 0.0014  |

|     |        |         |       |         |        |
|-----|--------|---------|-------|---------|--------|
| 83  | Q9UN79 | SOX13   | 1.3   | 8.2E-05 | 0.0016 |
| 84  | Q86X55 | CARM1   | 0.67  | 8.7E-05 | 0.0017 |
| 85  | O60341 | KDM1A   | 0.68  | 9.4E-05 | 0.0018 |
| 86  | P78413 | IRX4    | 1.03  | 1E-04   | 0.0019 |
| 87  | P39880 | CUX1    | 0.65  | 1E-04   | 0.0019 |
| 88  | Q96RN5 | MED15   | 1.26  | 1E-04   | 0.0019 |
| 89  | P35869 | AHR     | 0.55  | 0.00012 | 0.0021 |
| 90  | Q14190 | SIM2    | 0.74  | 0.00012 | 0.0023 |
| 91  | Q92908 | GATA6   | 1.09  | 0.00013 | 0.0023 |
| 92  | Q92973 | TNPO1   | 0.48  | 0.00013 | 0.0023 |
| 93  | Q9UBW7 | ZMYM2   | 1.88  | 0.00013 | 0.0023 |
| 94  | Q8IX15 | HOMEZ   | 1.6   | 0.00013 | 0.0023 |
| 95  | Q8N2W9 | PIAS4   | 1.19  | 0.00013 | 0.0023 |
| 96  | Q9C005 | DPY30   | 1.13  | 0.00014 | 0.0024 |
| 97  | Q6PJG2 | ELMSAN1 | 0.75  | 0.00015 | 0.0025 |
| 98  | P13631 | RARG    | 1.52  | 0.00015 | 0.0025 |
| 99  | Q9Y618 | NCOR2   | 0.77  | 0.00015 | 0.0026 |
| 100 | Q5HY92 | FIGN    | 0.94  | 0.00017 | 0.0028 |
| 101 | Q9UNE7 | STUB1   | -0.67 | 0.00019 | 0.0031 |
| 102 | P18847 | ATF3    | 1.26  | 2E-04   | 0.0032 |
| 103 | Q14149 | MORC3   | 1.37  | 0.00021 | 0.0033 |
| 104 | O60885 | BRD4    | 0.85  | 0.00022 | 0.0034 |
| 105 | Q14686 | NCOA6   | 0.57  | 0.00022 | 0.0035 |
| 106 | Q04726 | TLE3    | 0.73  | 0.00023 | 0.0036 |
| 107 | P17535 | JUND    | 1.03  | 0.00025 | 0.0038 |
| 108 | P10644 | PRKAR1A | -0.69 | 0.00028 | 0.0042 |
| 109 | Q13547 | HDAC1   | 0.66  | 0.00028 | 0.0042 |
| 110 | Q15291 | RBBP5   | 0.73  | 0.00028 | 0.0042 |
| 111 | O15294 | OGT     | 0.93  | 3E-04   | 0.0045 |
| 112 | Q8IX07 | ZFPM1   | 0.84  | 0.00031 | 0.0046 |
| 113 | Q8IU60 | DCP2    | -0.67 | 0.00037 | 0.0053 |
| 114 | Q8NFH4 | NUP37   | 0.66  | 0.00037 | 0.0054 |
| 115 | Q15185 | PTGES3  | -0.93 | 0.00038 | 0.0054 |
| 116 | Q9P2K3 | RCOR3   | 1.16  | 0.00039 | 0.0055 |
| 117 | Q9BTE3 | MCMBP   | -0.66 | 4E-04   | 0.0056 |
| 118 | Q08117 | AES     | 0.94  | 0.00042 | 0.0058 |
| 119 | Q9Y2X9 | ZNF281  | 0.79  | 0.00048 | 0.0066 |
| 120 | Q9HBE1 | PATZ1   | 0.89  | 0.00048 | 0.0066 |
| 121 | P23588 | EIF4B   | -0.57 | 5E-04   | 0.0069 |
| 122 | P31948 | STIP1   | -0.76 | 0.00052 | 0.0071 |
| 123 | P05412 | JUN     | 0.86  | 0.00053 | 0.0071 |
| 124 | P60842 | EIF4A1  | -0.58 | 0.00059 | 0.0079 |
| 125 | Q9UDV7 | ZNF282  | 0.84  | 0.00069 | 0.0091 |

|     |        |         |       |         |        |
|-----|--------|---------|-------|---------|--------|
| 126 | Q8WVV4 | POF1B   | 0.52  | 0.00075 | 0.0098 |
| 127 | O15417 | TNRC18  | 0.66  | 8E-04   | 0.01   |
| 128 | Q96F44 | TRIM11  | 0.86  | 0.00081 | 0.01   |
| 129 | O14980 | XPO1    | 0.45  | 0.00084 | 0.011  |
| 130 | P20073 | ANXA7   | 0.39  | 0.00087 | 0.011  |
| 131 | P52948 | NUP98   | -0.43 | 0.00088 | 0.011  |
| 132 | P06730 | EIF4E   | -0.4  | 0.00093 | 0.012  |
| 133 | Q49A26 | GLYR1   | -0.58 | 0.001   | 0.013  |
| 134 | Q13363 | CTBP1   | 0.57  | 0.001   | 0.013  |
| 135 | P16220 | CREB1   | 0.95  | 0.0011  | 0.013  |
| 136 | Q92614 | MYO18A  | -0.63 | 0.0011  | 0.014  |
| 137 | P24928 | POLR2A  | -0.43 | 0.0012  | 0.014  |
| 138 | Q5TGY3 | AHDC1   | 0.6   | 0.0012  | 0.015  |
| 139 | P35580 | MYH10   | -0.63 | 0.0013  | 0.016  |
| 140 | O75362 | ZNF217  | 0.73  | 0.0013  | 0.016  |
| 141 | Q53GS9 | USP39   | -0.54 | 0.0013  | 0.016  |
| 142 | Q9BV38 | WDR18   | -0.44 | 0.0015  | 0.018  |
| 143 | O75665 | OFD1    | -0.95 | 0.0016  | 0.018  |
| 144 | O15014 | ZNF609  | 0.69  | 0.0018  | 0.021  |
| 145 | Q9UEG4 | ZNF629  | 0.58  | 0.0019  | 0.022  |
| 146 | Q14240 | EIF4A2  | -0.47 | 0.0021  | 0.023  |
| 147 | O76074 | PDE5A   | -0.56 | 0.0021  | 0.023  |
| 148 | Q6UUV7 | CRTC3   | 0.81  | 0.0021  | 0.024  |
| 149 | P27824 | CANX    | -0.45 | 0.0022  | 0.025  |
| 150 | Q15121 | PEA15   | -0.44 | 0.0024  | 0.026  |
| 151 | Q9Y3C6 | PPIL1   | 0.35  | 0.0025  | 0.027  |
| 152 | Q6ZPD9 | DPY19L3 | -0.91 | 0.0025  | 0.027  |
| 153 | Q15056 | EIF4H   | -0.44 | 0.0025  | 0.027  |
| 154 | Q01664 | TFAP4   | 0.56  | 0.0028  | 0.03   |
| 155 | P05549 | TFAP2A  | 0.83  | 0.0028  | 0.03   |
| 156 | Q9H5N1 | RABEP2  | -0.4  | 0.0028  | 0.03   |
| 157 | Q9NYL9 | TMOD3   | 0.53  | 0.0029  | 0.03   |
| 158 | Q86YP4 | GATAD2A | 0.52  | 0.0029  | 0.03   |
| 159 | Q13951 | CBFB    | 0.61  | 0.003   | 0.031  |
| 160 | Q13464 | ROCK1   | -0.89 | 0.0031  | 0.031  |
| 161 | Q08379 | GOLGA2  | -0.38 | 0.0031  | 0.031  |
| 162 | Q9H910 | JPT2    | -0.58 | 0.0032  | 0.033  |
| 163 | O15327 | INPP4B  | -0.43 | 0.0032  | 0.033  |
| 164 | P78545 | ELF3    | 0.75  | 0.0033  | 0.033  |
| 165 | Q9HB71 | CACYBP  | -0.76 | 0.0033  | 0.033  |
| 166 | Q14687 | GSE1    | 0.55  | 0.0036  | 0.036  |
| 167 | P04040 | CAT     | -0.6  | 0.0037  | 0.036  |
| 168 | Q96KP4 | CNDP2   | -0.57 | 0.0037  | 0.037  |

|     |        |         |       |        |       |
|-----|--------|---------|-------|--------|-------|
| 169 | Q9NPI6 | DCP1A   | -0.44 | 0.0039 | 0.038 |
| 170 | O95758 | PTBP3   | -0.53 | 0.0039 | 0.038 |
| 171 | Q9H334 | FOXP1   | 0.67  | 0.0041 | 0.04  |
| 172 | A6NKD9 | CCDC85C | -0.45 | 0.0042 | 0.04  |
| 173 | Q93062 | RBPM5   | -0.62 | 0.0042 | 0.04  |
| 174 | Q13207 | TBX2    | 0.53  | 0.0043 | 0.041 |
| 175 | Q99594 | TEAD3   | 0.66  | 0.0043 | 0.041 |
| 176 | Q9BSF8 | BTBD10  | -0.51 | 0.0044 | 0.042 |
| 177 | Q03112 | MECOM   | 0.87  | 0.0047 | 0.044 |
| 178 | O96019 | ACTL6A  | 0.49  | 0.0048 | 0.044 |
| 179 | Q13227 | GPS2    | 0.6   | 0.0049 | 0.045 |
| 180 | Q7Z478 | DHX29   | -0.5  | 0.0051 | 0.046 |
| 181 | Q9BXW6 | OSBPL1A | -0.58 | 0.0051 | 0.046 |
| 182 | O95793 | STAU1   | -0.35 | 0.0052 | 0.047 |
| 183 | Q9UQR1 | ZNF148  | 0.57  | 0.0054 | 0.048 |
| 184 | Q16543 | CDC37   | -0.65 | 0.0054 | 0.048 |
