# Supplementary material for: ZMIZ1 enhances ERα-dependent expression of E2F2 in breast cancer
Source: PubMed Central journal article supplement (PMC11103680; doi:10.1530/jme-23-0133), 2024-04-25
Supplement: supplementary_table_2.pdf [file supplementary_table_2.pdf]

**Table S2 – Estrogen Responsive Cell Cycle Gene sets.**

|  | React Cell Cycle / Estrogen Responsive Overlap | GO Cell Cycle / Estrogen Responsive Overlap | Kegg Cell Cycle / Estrogen Responsive Overlap |
|--|------------------------------------------------|---------------------------------------------|-----------------------------------------------|
|  | E2F2                                           | CEP55                                       | MCM4                                          |
|  | FEN1                                           | CCNA2                                       | CCND1                                         |
|  | AHCTF1                                         | MCM4                                        | MCM6                                          |
|  | NSL1                                           | THBS1                                       | MCM5                                          |
|  | MCM2                                           | GIN52                                       | CCNA2                                         |
|  | MCM4                                           | SLC2A8                                      | BUB1                                          |
|  | MCM5                                           | KLK10                                       | MCM2                                          |
|  | MCM6                                           | E2F6                                        | CDC25A                                        |
|  | PCNA                                           | TUBA4A                                      | CDC6                                          |
|  | GIN52                                          | CCND1                                       | CDC20                                         |
|  | POLE2                                          | NOLC1                                       | SKP2                                          |
|  | ZWILCH                                         | RRM1                                        | PCNA                                          |
|  | MCM10                                          | MCM10                                       | E2F2                                          |
|  | CCND1                                          | SKP2                                        | CCNE2                                         |
|  | RFC4                                           | MCM5                                        |                                               |
|  | SKP2                                           | MCM2                                        |                                               |
|  | BUB1                                           | NCAPG2                                      |                                               |
|  | TUBA4A                                         | XRCC3                                       |                                               |
|  | CENPU                                          | DYNLT3                                      |                                               |
|  | CCNA2                                          | AUNIP                                       |                                               |
|  | CCNE2                                          | WDR62                                       |                                               |
|  | CDC6                                           | CDC6                                        |                                               |
|  | CDC20                                          | BUB1                                        |                                               |
|  | CDC25A                                         | PRR5                                        |                                               |
|  |                                                | CDC20                                       |                                               |
|  |                                                | SMC4                                        |                                               |
|  |                                                | E2F2                                        |                                               |
|  |                                                | DTL                                         |                                               |
|  |                                                | CCNE2                                       |                                               |
|  |                                                | CENPU                                       |                                               |
|  |                                                | UHRF1                                       |                                               |
|  |                                                | PCNA                                        |                                               |

|  |  |         |  |
|--|--|---------|--|
|  |  | ZWILCH  |  |
|  |  | SIAH2   |  |
|  |  | NSL1    |  |
|  |  | CDC25A  |  |
|  |  | FAM83D  |  |
|  |  | MCM6    |  |
|  |  | AHCTF1  |  |
|  |  | POLE2   |  |
|  |  | TPD52L1 |  |
